# Supplementary figures and images for: Voluntary running improves synaptic degeneration of the anterior cingulate cortex in knee osteoarthritis
Source: Research Square preprint supplement (doi:10.21203/rs.3.rs-5584661/v1), 2025-03-24

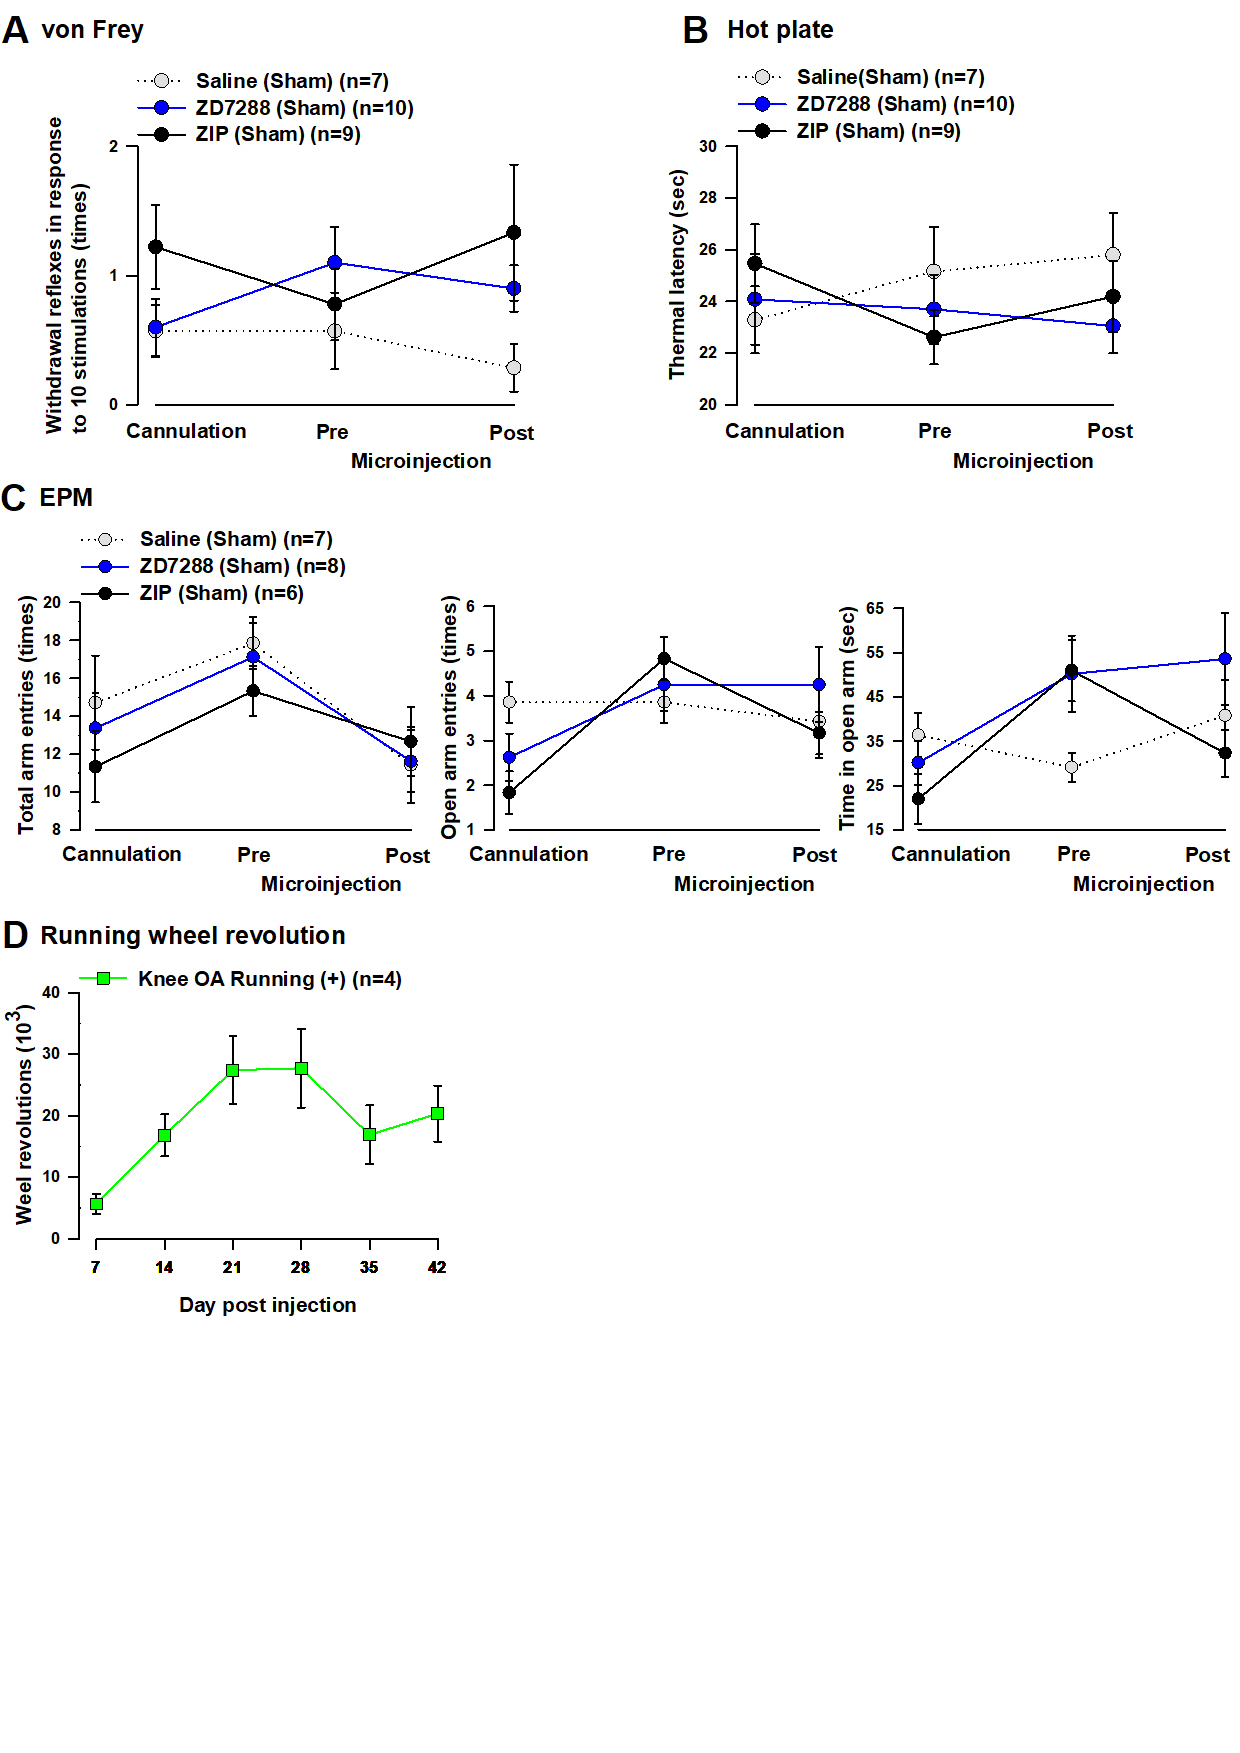

Supplement: Supplementary file 1 [file 568dd2b5cd3a73d0b6f13017.docx]
